# Supplementary material for: Benefit of adjuvant chemotherapy in patients with T4 UICC II colon cancer
Source: Springer Nature journal article supplement (doi:10.1186/s12885-015-1404-9), 2015-05-18
Supplement: MOESM1 [file 9744594]

**Suppl. Figure 1**

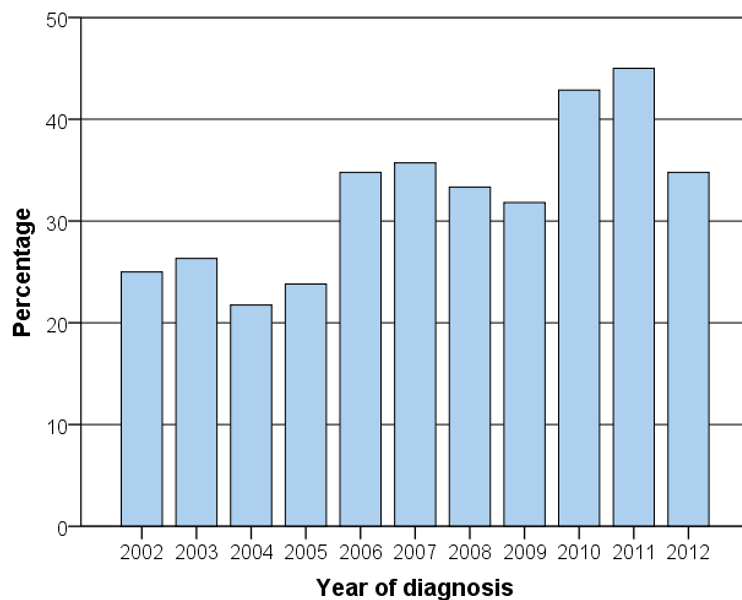

|                   |       | Chemotherapy |       |        |       |        |        |
|-------------------|-------|--------------|-------|--------|-------|--------|--------|
|                   |       | yes          |       | no     |       | total  |        |
|                   |       | number       | %     | number | %     | number | %      |
| Year of diagnosis | 2002  | 3            | 25,0% | 9      | 75,0% | 12     | 100,0% |
|                   | 2003  | 5            | 26,3% | 14     | 73,7% | 19     | 100,0% |
|                   | 2004  | 5            | 21,7% | 18     | 78,3% | 23     | 100,0% |
|                   | 2005  | 5            | 23,8% | 16     | 76,2% | 21     | 100,0% |
|                   | 2006  | 8            | 34,8% | 15     | 65,2% | 23     | 100,0% |
|                   | 2007  | 10           | 35,7% | 18     | 64,3% | 28     | 100,0% |
|                   | 2008  | 7            | 33,3% | 14     | 66,7% | 21     | 100,0% |
|                   | 2009  | 7            | 31,8% | 15     | 68,2% | 22     | 100,0% |
|                   | 2010  | 12           | 42,9% | 16     | 57,1% | 28     | 100,0% |
|                   | 2011  | 9            | 45,0% | 11     | 55,0% | 20     | 100,0% |
|                   | 2012  | 8            | 34,8% | 15     | 65,2% | 23     | 100,0% |
|                   | total | 79           | 32,9% | 161    | 67,1% | 240    | 100,0% |
