# Supplementary material for: Benefit of adjuvant chemotherapy in patients with T4 UICC II colon cancer
Source: Springer Nature journal article supplement (doi:10.1186/s12885-015-1404-9), 2015-05-18
Supplement: MOESM3 [file 9744594]

| Group        | Chemotherapy | Number |        | Recurrence free survival rate<br>RFS |                   | Log-Rank |
|--------------|--------------|--------|--------|--------------------------------------|-------------------|----------|
|              |              | Total  | Events | 5 years (%)                          | Median RFS<br>(m) | P-value  |
| All patients | + CTX        | 79     | 21     | 68.2                                 | 78.9              | 0.008    |
|              | - CTX        | 161    | 66     | 45.9                                 | 52.4              |          |
