# Supplementary material for: Benefit of adjuvant chemotherapy in patients with T4 UICC II colon cancer
Source: Springer Nature journal article supplement (doi:10.1186/s12885-015-1404-9), 2015-05-18
Supplement: MOESM4 [file 9744594]

| Group                    | Chemotherapy | Number |        | Cumulative recurrence rate |            | Log-Rank |
|--------------------------|--------------|--------|--------|----------------------------|------------|----------|
|                          |              | Total  | Events | 5 years (%)                | Median (m) | P-value  |
| All recurrences          | + CTX        | 79     | 16     | 27.1                       | -          | 0.700    |
|                          | - CTX        | 161    | 23     | 22.1                       | -          |          |
| Locoregional recurrences | + CTX        | 79     | 7      | 10.1                       | -          | 0.367    |
|                          | - CTX        | 161    | 7      | 6.3                        | -          |          |
| Distant recurrences      | + CTX        | 79     | 12     | 21.7                       | -          | 0.508    |
|                          | - CTX        | 161    | 15     | 13.6                       | -          |          |
