# Supplementary material for: Benefit of adjuvant chemotherapy in patients with T4 UICC II colon cancer
Source: Springer Nature journal article supplement (doi:10.1186/s12885-015-1404-9), 2015-05-18
Supplement: MOESM5 [file 9744594]

|                              | Hazard ratio Chemotherapy yes vs no |             |                 |                |                          |             |                 |                |
|------------------------------|-------------------------------------|-------------|-----------------|----------------|--------------------------|-------------|-----------------|----------------|
|                              | unadjusted (univariable)            |             |                 |                | adjusted (multivariable) |             |                 |                |
| Outcome                      | p-value                             | HR          | lower<br>95% CI | upper<br>95% C | p-value                  | HR          | lower<br>95% CI | upper<br>95% C |
| Overall survival OAS         | 0.001                               | <b>0.38</b> | 0.21            | 0.68           | 0.005                    | <b>0.41</b> | 0.22            | 0.76           |
| Recurrence free survival RFS | 0.010                               | <b>0.52</b> | 0.32            | 0.85           | 0.020                    | <b>0.55</b> | 0.33            | 0.91           |
| Recurrence free time         | 0.700                               | <b>1.13</b> | 0.60            | 2.15           | 0.868                    | <b>0.95</b> | 0.49            | 1.83           |
