# Supplementary material for: Benefit of adjuvant chemotherapy in patients with T4 UICC II colon cancer
Source: Springer Nature journal article supplement (doi:10.1186/s12885-015-1404-9), 2015-05-18
Supplement: MOESM7 [file 9744594]

| <b>Chemotherapy</b>                                               | <b>N</b>  | <b>%</b>    |
|-------------------------------------------------------------------|-----------|-------------|
| 5-Fluorouracil (+/- folinic acid) <sup>1</sup>                    | 8         | 20,5        |
| 5-Fluorouracil, folinic acid, Irinotecan (FOLIFIRI)               | 7         | 17,9        |
| 5-Fluorouracil, folinic acid, Oxaliplatin (FOLIFOX) <sup>2</sup>  | 5         | 12,8        |
| 5-Fluorouracil, folinic acid, Irinotecan (FOLIFIRI) + Bevacizumab | 2         | 5,1         |
| 5-Fluorouracil, folinic acid, Oxaliplatin (FOLIFOX) + Bevacizumab | 2         | 5,1         |
| Cetuximab                                                         | 1         | 2,6         |
| Chemotherapy not specified                                        | 1         | 2,6         |
| <b>No Chemotherapy</b>                                            | <b>13</b> | <b>33,3</b> |
| <b>Total</b>                                                      | <b>39</b> | <b>100</b>  |

<sup>1</sup> including treatment with Capecitabin, <sup>2</sup> including FOLFOX 4, 6, 7 and XELOX regimens
